# Supplementary material
Source: Springer Nature journal article supplement (https://www.springermedizin.de/resource/supplementary/12885_2008_1411_MOESM5_ESM.pdf/9473058)

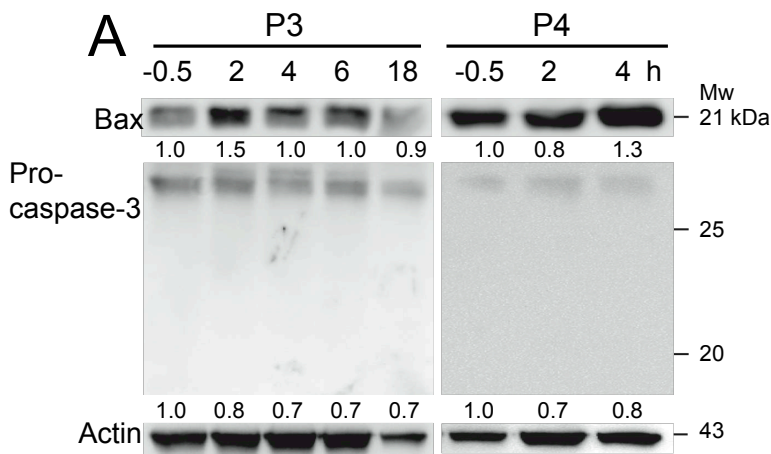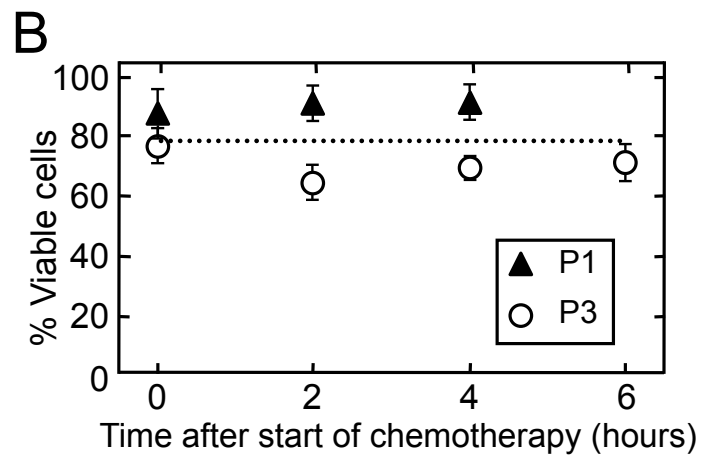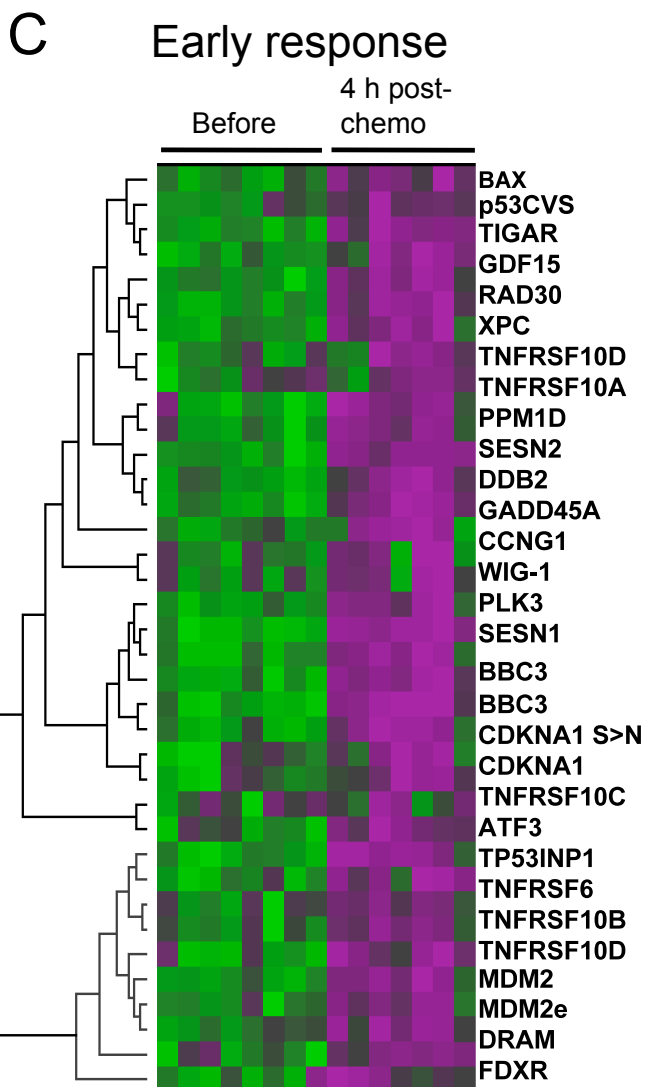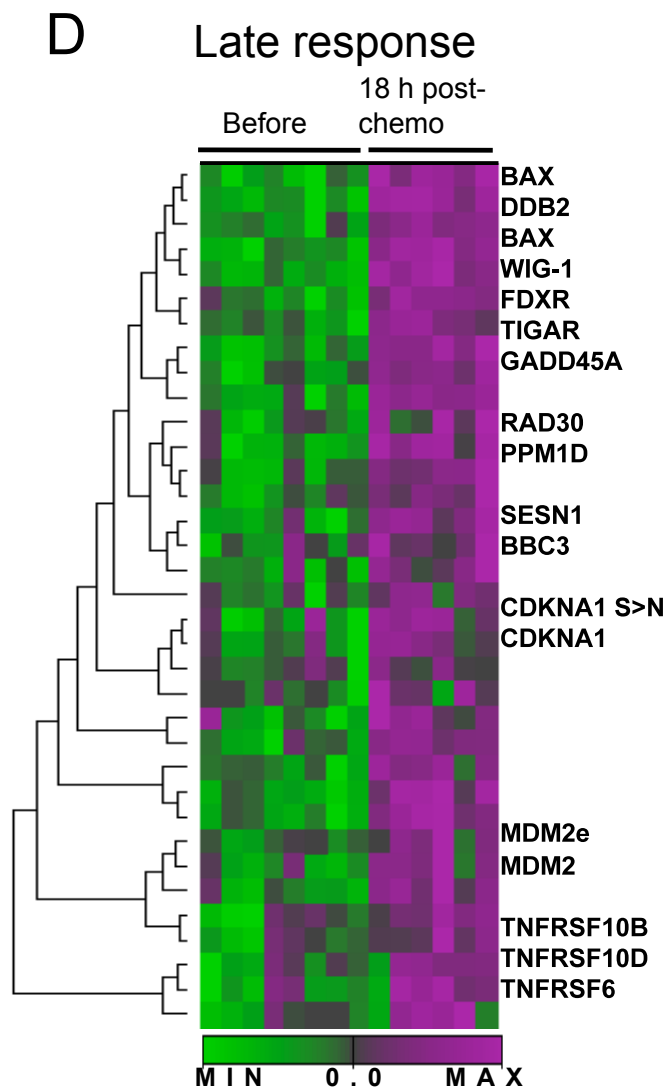

Distance metrics: Euclidean  
 Cluster method: Average Linkage (WPGMA)

Supplement: MOESM5 [file 9473058]
